# Supplementary material for: Alterations in the Aedes aegypti Transcriptome during Infection with West Nile, Dengue and Yellow Fever Viruses
Source: PLoS Pathog. 2011 Sep 1;7(9):e1002189. doi: 10.1371/journal.ppat.1002189 (PMC3164632; doi:10.1371/journal.ppat.1002189)
Supplement: Table S3 — Functional clustering of DEGs. DURGs and DDRGs were assigned to functional categories for biological process, molecular function and cellular component. Genes were analyzed for functional clustering. Enrichment scores are listed for each cluster. (XLS) [file ppat.1002189.s008.xls]

## Sheet: Down GO BP
Functional clustering of DDRGs for GO category "Biological Process"
Annotation Cluster 1	Enrichment Score: 6.858517482434991
Category	Term	Count	%	PValue	Genes	List Total	Pop Hits	Pop Total	Fold Enrichment	Bonferroni	Benjamini	FDR
GOTERM_BP_FAT	GO:0006030~chitin metabolic process	12	6.06061	6.54407e-08	AAEL_AAEL002482, AAEL_AAEL012645, AAEL_AAEL009577, AAEL_AAEL004897, AAEL_AAEL013222, AAEL_AAEL005748, AAEL_AAEL003715, AAEL_AAEL012245, AAEL_AAEL002780, AAEL_AAEL014445, AAEL_AAEL012728, AAEL_AAEL013367	46	143	4651	8.48465	5.43157e-06	5.43157e-06	7.00782e-05
GOTERM_BP_FAT	GO:0006022~aminoglycan metabolic process	12	6.06061	1.50842e-07	AAEL_AAEL002482, AAEL_AAEL012645, AAEL_AAEL009577, AAEL_AAEL004897, AAEL_AAEL013222, AAEL_AAEL005748, AAEL_AAEL003715, AAEL_AAEL012245, AAEL_AAEL002780, AAEL_AAEL014445, AAEL_AAEL012728, AAEL_AAEL013367	46	155	4651	7.82777	1.25199e-05	6.25994e-06	0.000161532
GOTERM_BP_FAT	GO:0005976~polysaccharide metabolic process	12	6.06061	2.692e-07	AAEL_AAEL002482, AAEL_AAEL012645, AAEL_AAEL009577, AAEL_AAEL004897, AAEL_AAEL013222, AAEL_AAEL005748, AAEL_AAEL003715, AAEL_AAEL012245, AAEL_AAEL002780, AAEL_AAEL014445, AAEL_AAEL012728, AAEL_AAEL013367	46	164	4651	7.3982	2.23434e-05	7.44785e-06	0.000288277

## Sheet: Down GO CC
Functional clustering of DDRGs for GO category "Cellular Component"
Annotation Cluster 1	Enrichment Score: 1.060596067560452
Category	Term	Count	%	PValue	Genes	List Total	Pop Hits	Pop Total	Fold Enrichment	Bonferroni	Benjamini	FDR
GOTERM_CC_FAT	GO:0045211~postsynaptic membrane	3	1.51515	0.0714469	AAEL_AAEL004958, AAEL_AAEL004935, AAEL_AAEL004923	30	35	2286	6.53143	0.486831	0.283642	34.7279
GOTERM_CC_FAT	GO:0044456~synapse part	3	1.51515	0.0940133	AAEL_AAEL004958, AAEL_AAEL004935, AAEL_AAEL004923	30	41	2286	5.57561	0.588759	0.256355	43.3453
GOTERM_CC_FAT	GO:0045202~synapse	3	1.51515	0.0979578	AAEL_AAEL004958, AAEL_AAEL004935, AAEL_AAEL004923	30	42	2286	5.44286	0.604596	0.207023	44.7503

## Sheet: Down GO MF
Functional clustering of DDRGs for GO category "Molecular Function"
Annotation Cluster 1	Enrichment Score: 6.2990388027779325
Category	Term	Count	%	PValue	Genes	List Total	Pop Hits	Pop Total	Fold Enrichment	Bonferroni	Benjamini	FDR
GOTERM_MF_FAT	GO:0008061~chitin binding	12	6.06061	2.50396e-07	AAEL_AAEL002482, AAEL_AAEL012645, AAEL_AAEL009577, AAEL_AAEL004897, AAEL_AAEL013222, AAEL_AAEL005748, AAEL_AAEL003715, AAEL_AAEL012245, AAEL_AAEL002780, AAEL_AAEL014445, AAEL_AAEL012728, AAEL_AAEL013367	83	125	6775	7.83614	2.12835e-05	7.09454e-06	0.000269394
GOTERM_MF_FAT	GO:0001871~pattern binding	12	6.06061	2.71689e-07	AAEL_AAEL002482, AAEL_AAEL012645, AAEL_AAEL009577, AAEL_AAEL004897, AAEL_AAEL013222, AAEL_AAEL005748, AAEL_AAEL003715, AAEL_AAEL012245, AAEL_AAEL002780, AAEL_AAEL014445, AAEL_AAEL012728, AAEL_AAEL013367	83	126	6775	7.77395	2.30933e-05	5.77337e-06	0.000292302
GOTERM_MF_FAT	GO:0030247~polysaccharide binding	12	6.06061	2.71689e-07	AAEL_AAEL002482, AAEL_AAEL012645, AAEL_AAEL009577, AAEL_AAEL004897, AAEL_AAEL013222, AAEL_AAEL005748, AAEL_AAEL003715, AAEL_AAEL012245, AAEL_AAEL002780, AAEL_AAEL014445, AAEL_AAEL012728, AAEL_AAEL013367	83	126	6775	7.77395	2.30933e-05	5.77337e-06	0.000292302
GOTERM_MF_FAT	GO:0030246~carbohydrate binding	13	6.56566	3.44408e-06	AAEL_AAEL009577, AAEL_AAEL012645, AAEL_AAEL004897, AAEL_AAEL013222, AAEL_AAEL005748, AAEL_AAEL014445, AAEL_AAEL002482, AAEL_AAEL003715, AAEL_AAEL012245, AAEL_AAEL002780, AAEL_AAEL000556, AAEL_AAEL012728, AAEL_AAEL013367	83	196	6775	5.414	0.000292704	5.85477e-05	0.00370533
Annotation Cluster 2	Enrichment Score: 1.4187500740802592
Category	Term	Count	%	PValue	Genes	List Total	Pop Hits	Pop Total	Fold Enrichment	Bonferroni	Benjamini	FDR
GOTERM_MF_FAT	GO:0008233~peptidase activity	16	8.08081	0.0231334	AAEL_AAEL006323, AAEL_AAEL012797, AAEL_AAEL013033, AAEL_AAEL005748, AAEL_AAEL006568, AAEL_AAEL012216, AAEL_AAEL007106, AAEL_AAEL010267, AAEL_AAEL002585, AAEL_AAEL006585, AAEL_AAEL010139, AAEL_AAEL011375, AAEL_AAEL002696, AAEL_AAEL003012, AAEL_AAEL012791, AAEL_AAEL015312	83	715	6775	1.82661	0.863228	0.247388	22.2608
GOTERM_MF_FAT	GO:0070011~peptidase activity, acting on L-amino acid peptides	15	7.57576	0.0252637	AAEL_AAEL006323, AAEL_AAEL012797, AAEL_AAEL013033, AAEL_AAEL005748, AAEL_AAEL006568, AAEL_AAEL012216, AAEL_AAEL007106, AAEL_AAEL010267, AAEL_AAEL002585, AAEL_AAEL006585, AAEL_AAEL011375, AAEL_AAEL002696, AAEL_AAEL003012, AAEL_AAEL012791, AAEL_AAEL015312	83	658	6775	1.86079	0.886392	0.238051	24.0654
GOTERM_MF_FAT	GO:0004252~serine-type endopeptidase activity	10	5.05051	0.0386701	AAEL_AAEL012797, AAEL_AAEL013033, AAEL_AAEL006585, AAEL_AAEL011375, AAEL_AAEL005748, AAEL_AAEL006568, AAEL_AAEL010267, AAEL_AAEL007106, AAEL_AAEL012791, AAEL_AAEL002585	83	379	6775	2.15373	0.964993	0.310967	34.5772
GOTERM_MF_FAT	GO:0004175~endopeptidase activity	12	6.06061	0.0439265	AAEL_AAEL012797, AAEL_AAEL013033, AAEL_AAEL006585, AAEL_AAEL011375, AAEL_AAEL005748, AAEL_AAEL006568, AAEL_AAEL012216, AAEL_AAEL010267, AAEL_AAEL007106, AAEL_AAEL012791, AAEL_AAEL002585, AAEL_AAEL015312	83	513	6775	1.90939	0.978034	0.317385	38.3247
GOTERM_MF_FAT	GO:0017171~serine hydrolase activity	10	5.05051	0.0556328	AAEL_AAEL012797, AAEL_AAEL013033, AAEL_AAEL006585, AAEL_AAEL011375, AAEL_AAEL005748, AAEL_AAEL006568, AAEL_AAEL010267, AAEL_AAEL007106, AAEL_AAEL012791, AAEL_AAEL002585	83	406	6775	2.01051	0.992291	0.35745	45.9809
GOTERM_MF_FAT	GO:0008236~serine-type peptidase activity	10	5.05051	0.0556328	AAEL_AAEL012797, AAEL_AAEL013033, AAEL_AAEL006585, AAEL_AAEL011375, AAEL_AAEL005748, AAEL_AAEL006568, AAEL_AAEL010267, AAEL_AAEL007106, AAEL_AAEL012791, AAEL_AAEL002585	83	406	6775	2.01051	0.992291	0.35745	45.9809
Annotation Cluster 3	Enrichment Score: 0.48563475350208196
Category	Term	Count	%	PValue	Genes	List Total	Pop Hits	Pop Total	Fold Enrichment	Bonferroni	Benjamini	FDR
GOTERM_MF_FAT	GO:0005230~extracellular ligand-gated ion channel activity	3	1.51515	0.114333	AAEL_AAEL004958, AAEL_AAEL004935, AAEL_AAEL004923	83	48	6775	5.10166	0.999967	0.576845	72.9169
GOTERM_MF_FAT	GO:0015276~ligand-gated ion channel activity	3	1.51515	0.146955	AAEL_AAEL004958, AAEL_AAEL004935, AAEL_AAEL004923	83	56	6775	4.37285	0.999999	0.646278	81.9139
GOTERM_MF_FAT	GO:0022834~ligand-gated channel activity	3	1.51515	0.146955	AAEL_AAEL004958, AAEL_AAEL004935, AAEL_AAEL004923	83	56	6775	4.37285	0.999999	0.646278	81.9139
GOTERM_MF_FAT	GO:0022836~gated channel activity	3	1.51515	0.32431	AAEL_AAEL004958, AAEL_AAEL004935, AAEL_AAEL004923	83	96	6775	2.55083	1	0.891549	98.5267
GOTERM_MF_FAT	GO:0005216~ion channel activity	3	1.51515	0.633571	AAEL_AAEL004958, AAEL_AAEL004935, AAEL_AAEL004923	83	176	6775	1.39136	1	0.993394	99.998
GOTERM_MF_FAT	GO:0022838~substrate specific channel activity	3	1.51515	0.633571	AAEL_AAEL004958, AAEL_AAEL004935, AAEL_AAEL004923	83	176	6775	1.39136	1	0.993394	99.998
GOTERM_MF_FAT	GO:0015267~channel activity	3	1.51515	0.63667	AAEL_AAEL004958, AAEL_AAEL004935, AAEL_AAEL004923	83	177	6775	1.3835	1	0.991612	99.9981
GOTERM_MF_FAT	GO:0022803~passive transmembrane transporter activity	3	1.51515	0.63667	AAEL_AAEL004958, AAEL_AAEL004935, AAEL_AAEL004923	83	177	6775	1.3835	1	0.991612	99.9981
Annotation Cluster 4	Enrichment Score: 0.11043313341455532
Category	Term	Count	%	PValue	Genes	List Total	Pop Hits	Pop Total	Fold Enrichment	Bonferroni	Benjamini	FDR
GOTERM_MF_FAT	GO:0005506~iron ion binding	4	2.0202	0.727685	AAEL_AAEL000320, AAEL_AAEL012770, AAEL_AAEL010396, AAEL_AAEL000340	83	308	6775	1.06008	1	0.99703	99.9999
GOTERM_MF_FAT	GO:0020037~heme binding	3	1.51515	0.762565	AAEL_AAEL000320, AAEL_AAEL012770, AAEL_AAEL000340	83	225	6775	1.08835	1	0.997781	100
GOTERM_MF_FAT	GO:0046906~tetrapyrrole binding	3	1.51515	0.764739	AAEL_AAEL000320, AAEL_AAEL012770, AAEL_AAEL000340	83	226	6775	1.08354	1	0.997141	100
GOTERM_MF_FAT	GO:0009055~electron carrier activity	3	1.51515	0.852185	AAEL_AAEL000320, AAEL_AAEL012770, AAEL_AAEL000340	83	275	6775	0.890471	1	0.99938	100
Annotation Cluster 5	Enrichment Score: 3.7041891569744324E-4
Category	Term	Count	%	PValue	Genes	List Total	Pop Hits	Pop Total	Fold Enrichment	Bonferroni	Benjamini	FDR
GOTERM_MF_FAT	GO:0001883~purine nucleoside binding	4	2.0202	0.998188	AAEL_AAEL005964, AAEL_AAEL012189, AAEL_AAEL015290, AAEL_AAEL000834	83	821	6775	0.397693	1	1	100
GOTERM_MF_FAT	GO:0030554~adenyl nucleotide binding	4	2.0202	0.998188	AAEL_AAEL005964, AAEL_AAEL012189, AAEL_AAEL015290, AAEL_AAEL000834	83	821	6775	0.397693	1	1	100
GOTERM_MF_FAT	GO:0001882~nucleoside binding	4	2.0202	0.998268	AAEL_AAEL005964, AAEL_AAEL012189, AAEL_AAEL015290, AAEL_AAEL000834	83	825	6775	0.395765	1	1	100
GOTERM_MF_FAT	GO:0005524~ATP binding	3	1.51515	0.999148	AAEL_AAEL005964, AAEL_AAEL012189, AAEL_AAEL015290	83	735	6775	0.333169	1	1	100
GOTERM_MF_FAT	GO:0032559~adenyl ribonucleotide binding	3	1.51515	0.999169	AAEL_AAEL005964, AAEL_AAEL012189, AAEL_AAEL015290	83	737	6775	0.332265	1	1	100
GOTERM_MF_FAT	GO:0017076~purine nucleotide binding	4	2.0202	0.99967	AAEL_AAEL005964, AAEL_AAEL012189, AAEL_AAEL015290, AAEL_AAEL000834	83	967	6775	0.337648	1	1	100
GOTERM_MF_FAT	GO:0032555~purine ribonucleotide binding	3	1.51515	0.999862	AAEL_AAEL005964, AAEL_AAEL012189, AAEL_AAEL015290	83	880	6775	0.278272	1	1	100
GOTERM_MF_FAT	GO:0032553~ribonucleotide binding	3	1.51515	0.999862	AAEL_AAEL005964, AAEL_AAEL012189, AAEL_AAEL015290	83	880	6775	0.278272	1	1	100
GOTERM_MF_FAT	GO:0000166~nucleotide binding	4	2.0202	0.999974	AAEL_AAEL005964, AAEL_AAEL012189, AAEL_AAEL015290, AAEL_AAEL000834	83	1173	6775	0.278351	1	1	100
Annotation Cluster 6	Enrichment Score: 1.2907146622121701E-5
Category	Term	Count	%	PValue	Genes	List Total	Pop Hits	Pop Total	Fold Enrichment	Bonferroni	Benjamini	FDR
GOTERM_MF_FAT	GO:0046914~transition metal ion binding	9	4.54545	0.999949	AAEL_AAEL000320, AAEL_AAEL006323, AAEL_AAEL007415, AAEL_AAEL008450, AAEL_AAEL012770, AAEL_AAEL010396, AAEL_AAEL002696, AAEL_AAEL003012, AAEL_AAEL000340	83	1774	6775	0.414114	1	1	100
GOTERM_MF_FAT	GO:0043167~ion binding	12	6.06061	0.999964	AAEL_AAEL000320, AAEL_AAEL006323, AAEL_AAEL010965, AAEL_AAEL007415, AAEL_AAEL008450, AAEL_AAEL012770, AAEL_AAEL007226, AAEL_AAEL010396, AAEL_AAEL004897, AAEL_AAEL002696, AAEL_AAEL003012, AAEL_AAEL000340	83	2141	6775	0.457505	1	1	100
GOTERM_MF_FAT	GO:0043169~cation binding	12	6.06061	0.999964	AAEL_AAEL000320, AAEL_AAEL006323, AAEL_AAEL010965, AAEL_AAEL007415, AAEL_AAEL008450, AAEL_AAEL012770, AAEL_AAEL007226, AAEL_AAEL010396, AAEL_AAEL004897, AAEL_AAEL002696, AAEL_AAEL003012, AAEL_AAEL000340	83	2141	6775	0.457505	1	1	100
GOTERM_MF_FAT	GO:0046872~metal ion binding	11	5.55556	0.999976	AAEL_AAEL000320, AAEL_AAEL006323, AAEL_AAEL010965, AAEL_AAEL007415, AAEL_AAEL008450, AAEL_AAEL012770, AAEL_AAEL007226, AAEL_AAEL010396, AAEL_AAEL002696, AAEL_AAEL003012, AAEL_AAEL000340	83	2066	6775	0.434604	1	1	100
GOTERM_MF_FAT	GO:0008270~zinc ion binding	4	2.0202	0.999999	AAEL_AAEL006323, AAEL_AAEL008450, AAEL_AAEL002696, AAEL_AAEL003012	83	1405	6775	0.232389	1	1	100

## Sheet: Up GO BP
Functional clustering of DURGs for GO category "Biological Process"
Annotation Cluster 1	Enrichment Score: 0.9097414142047628
Category	Term	Count	%	PValue	Genes	List Total	Pop Hits	Pop Total	Fold Enrichment	Bonferroni	Benjamini	FDR
GOTERM_BP_FAT	GO:0006355~regulation of transcription, DNA-dependent	6	3.0303	0.09258	AAEL_AAEL009263, AAEL_AAEL004130, AAEL_AAEL013168, AAEL_AAEL007285, AAEL_AAEL013518, AAEL_AAEL002477	36	324	4651	2.39249	0.999902	0.999902	65.6262
GOTERM_BP_FAT	GO:0051252~regulation of RNA metabolic process	6	3.0303	0.0935238	AAEL_AAEL009263, AAEL_AAEL004130, AAEL_AAEL013168, AAEL_AAEL007285, AAEL_AAEL013518, AAEL_AAEL002477	36	325	4651	2.38513	0.999911	0.990572	66.0172
GOTERM_BP_FAT	GO:0045449~regulation of transcription	6	3.0303	0.215445	AAEL_AAEL009263, AAEL_AAEL004130, AAEL_AAEL013168, AAEL_AAEL007285, AAEL_AAEL013518, AAEL_AAEL002477	36	428	4651	1.81114	1	0.900248	93.0546
Annotation Cluster 2	Enrichment Score: 0.8831730774382978
Category	Term	Count	%	PValue	Genes	List Total	Pop Hits	Pop Total	Fold Enrichment	Bonferroni	Benjamini	FDR
GOTERM_BP_FAT	GO:0006333~chromatin assembly or disassembly	3	1.51515	0.0943901	AAEL_AAEL006720, AAEL_AAEL003669, AAEL_AAEL003685	36	69	4651	5.61715	0.999919	0.956702	66.3724
GOTERM_BP_FAT	GO:0006325~chromatin organization	3	1.51515	0.146389	AAEL_AAEL006720, AAEL_AAEL003669, AAEL_AAEL003685	36	90	4651	4.30648	1	0.918414	82.4448
GOTERM_BP_FAT	GO:0051276~chromosome organization	3	1.51515	0.162198	AAEL_AAEL006720, AAEL_AAEL003669, AAEL_AAEL003685	36	96	4651	4.03733	1	0.909443	85.7056
Annotation Cluster 3	Enrichment Score: 0.5910981075050341
Category	Term	Count	%	PValue	Genes	List Total	Pop Hits	Pop Total	Fold Enrichment	Bonferroni	Benjamini	FDR
GOTERM_BP_FAT	GO:0007606~sensory perception of chemical stimulus	3	1.51515	0.133493	AAEL_AAEL013507, AAEL_AAEL007933, AAEL_AAEL015506	36	85	4651	4.5598	0.999999	0.934285	79.2993
GOTERM_BP_FAT	GO:0050890~cognition	3	1.51515	0.181025	AAEL_AAEL013507, AAEL_AAEL007933, AAEL_AAEL015506	36	103	4651	3.76294	1	0.906656	88.8657
GOTERM_BP_FAT	GO:0007600~sensory perception	3	1.51515	0.181025	AAEL_AAEL013507, AAEL_AAEL007933, AAEL_AAEL015506	36	103	4651	3.76294	1	0.906656	88.8657
GOTERM_BP_FAT	GO:0050877~neurological system process	3	1.51515	0.197429	AAEL_AAEL013507, AAEL_AAEL007933, AAEL_AAEL015506	36	109	4651	3.55581	1	0.901877	91.0859
GOTERM_BP_FAT	GO:0007186~G-protein coupled receptor protein signaling pathway	3	1.51515	0.520375	AAEL_AAEL013507, AAEL_AAEL007933, AAEL_AAEL015506	36	229	4651	1.6925	1	0.969501	99.9689
GOTERM_BP_FAT	GO:0007166~cell surface receptor linked signal transduction	3	1.51515	0.632043	AAEL_AAEL013507, AAEL_AAEL007933, AAEL_AAEL015506	36	280	4651	1.38423	1	0.986664	99.9983
Annotation Cluster 4	Enrichment Score: 0.5200945705965947
Category	Term	Count	%	PValue	Genes	List Total	Pop Hits	Pop Total	Fold Enrichment	Bonferroni	Benjamini	FDR
GOTERM_BP_FAT	GO:0006793~phosphorus metabolic process	5	2.52525	0.277941	AAEL_AAEL001559, AAEL_AAEL007632, AAEL_AAEL015625, AAEL_AAEL011669, AAEL_AAEL004761	36	356	4651	1.81453	1	0.93994	97.2111
GOTERM_BP_FAT	GO:0006796~phosphate metabolic process	5	2.52525	0.277941	AAEL_AAEL001559, AAEL_AAEL007632, AAEL_AAEL015625, AAEL_AAEL011669, AAEL_AAEL004761	36	356	4651	1.81453	1	0.93994	97.2111
GOTERM_BP_FAT	GO:0006468~protein amino acid phosphorylation	4	2.0202	0.279661	AAEL_AAEL001559, AAEL_AAEL007632, AAEL_AAEL011669, AAEL_AAEL004761	36	245	4651	2.1093	1	0.925498	97.2833
GOTERM_BP_FAT	GO:0016310~phosphorylation	4	2.0202	0.384667	AAEL_AAEL001559, AAEL_AAEL007632, AAEL_AAEL011669, AAEL_AAEL004761	36	295	4651	1.75179	1	0.922915	99.5193
Annotation Cluster 5	Enrichment Score: 0.5058864816954864
Category	Term	Count	%	PValue	Genes	List Total	Pop Hits	Pop Total	Fold Enrichment	Bonferroni	Benjamini	FDR
GOTERM_BP_FAT	GO:0006814~sodium ion transport	3	1.51515	0.0990682	AAEL_AAEL002326, AAEL_AAEL000443, AAEL_AAEL013647	36	71	4651	5.45892	0.99995	0.916067	68.2334
GOTERM_BP_FAT	GO:0015672~monovalent inorganic cation transport	3	1.51515	0.298322	AAEL_AAEL002326, AAEL_AAEL000443, AAEL_AAEL013647	36	145	4651	2.67299	1	0.909648	97.9642
GOTERM_BP_FAT	GO:0030001~metal ion transport	3	1.51515	0.323592	AAEL_AAEL002326, AAEL_AAEL000443, AAEL_AAEL013647	36	154	4651	2.51677	1	0.915927	98.6397
GOTERM_BP_FAT	GO:0006812~cation transport	3	1.51515	0.463576	AAEL_AAEL002326, AAEL_AAEL000443, AAEL_AAEL013647	36	206	4651	1.88147	1	0.955584	99.8936
GOTERM_BP_FAT	GO:0006811~ion transport	3	1.51515	0.666545	AAEL_AAEL002326, AAEL_AAEL000443, AAEL_AAEL013647	36	298	4651	1.30062	1	0.989286	99.9994
Annotation Cluster 6	Enrichment Score: 0.491334209312366
Category	Term	Count	%	PValue	Genes	List Total	Pop Hits	Pop Total	Fold Enrichment	Bonferroni	Benjamini	FDR
GOTERM_BP_FAT	GO:0006030~chitin metabolic process	3	1.51515	0.29269	AAEL_AAEL004157, AAEL_AAEL008380, AAEL_AAEL000901	36	143	4651	2.71037	1	0.920385	97.7772
GOTERM_BP_FAT	GO:0006022~aminoglycan metabolic process	3	1.51515	0.32639	AAEL_AAEL004157, AAEL_AAEL008380, AAEL_AAEL000901	36	155	4651	2.50054	1	0.904242	98.7003
GOTERM_BP_FAT	GO:0005976~polysaccharide metabolic process	3	1.51515	0.351442	AAEL_AAEL004157, AAEL_AAEL008380, AAEL_AAEL000901	36	164	4651	2.36331	1	0.911054	99.1431

## Sheet: Up GO CC
Functional clustering of DURGs for GO category "Cellular Component"
Annotation Cluster 1	Enrichment Score: 0.8253929895946199
Category	Term	Count	%	PValue	Genes	List Total	Pop Hits	Pop Total	Fold Enrichment	Bonferroni	Benjamini	FDR
GOTERM_CC_FAT	GO:0000785~chromatin	3	1.51515	0.0536077	AAEL_AAEL006720, AAEL_AAEL003669, AAEL_AAEL003685	14	67	2286	7.3113	0.702446	0.702446	35.0282
GOTERM_CC_FAT	GO:0044427~chromosomal part	3	1.51515	0.0687135	AAEL_AAEL006720, AAEL_AAEL003669, AAEL_AAEL003685	14	77	2286	6.36178	0.791151	0.543	42.7157
GOTERM_CC_FAT	GO:0005694~chromosome	3	1.51515	0.0902328	AAEL_AAEL006720, AAEL_AAEL003669, AAEL_AAEL003685	14	90	2286	5.44286	0.875128	0.50017	52.2939
GOTERM_CC_FAT	GO:0043228~non-membrane-bounded organelle	4	2.0202	0.473915	AAEL_AAEL006720, AAEL_AAEL003669, AAEL_AAEL007918, AAEL_AAEL003685	14	442	2286	1.4777	0.999999	0.940756	99.344
GOTERM_CC_FAT	GO:0043232~intracellular non-membrane-bounded organelle	4	2.0202	0.473915	AAEL_AAEL006720, AAEL_AAEL003669, AAEL_AAEL007918, AAEL_AAEL003685	14	442	2286	1.4777	0.999999	0.940756	99.344
Annotation Cluster 2	Enrichment Score: 0.17056796761270815
Category	Term	Count	%	PValue	Genes	List Total	Pop Hits	Pop Total	Fold Enrichment	Bonferroni	Benjamini	FDR
GOTERM_CC_FAT	GO:0005886~plasma membrane	3	1.51515	0.310236	AAEL_AAEL013507, AAEL_AAEL007933, AAEL_AAEL015506	14	197	2286	2.48658	0.999717	0.870326	94.5347
GOTERM_CC_FAT	GO:0016021~integral to membrane	3	1.51515	0.995835	AAEL_AAEL013507, AAEL_AAEL007933, AAEL_AAEL015506	14	1045	2286	0.468763	1	1	100
GOTERM_CC_FAT	GO:0031224~intrinsic to membrane	3	1.51515	0.996359	AAEL_AAEL013507, AAEL_AAEL007933, AAEL_AAEL015506	14	1060	2286	0.462129	1	1	100

## Sheet: Up GO MF
Functional clustering of DURGs for GO category "Molecular Function"
Annotation Cluster 1	Enrichment Score: 3.0737863490735675
Category	Term	Count	%	PValue	Genes	List Total	Pop Hits	Pop Total	Fold Enrichment	Bonferroni	Benjamini	FDR
GOTERM_MF_FAT	GO:0008270~zinc ion binding	30	15.1515	3.31089e-05	AAEL_AAEL003339, AAEL_AAEL002753, AAEL_AAEL000337, AAEL_AAEL008429, AAEL_AAEL001958, AAEL_AAEL003692, AAEL_AAEL008602, AAEL_AAEL015042, AAEL_AAEL008903, AAEL_AAEL011838, AAEL_AAEL011141, AAEL_AAEL006839, AAEL_AAEL013048, AAEL_AAEL005923, AAEL_AAEL004170, AAEL_AAEL006986, AAEL_AAEL014210, AAEL_AAEL013168, AAEL_AAEL008547, AAEL_AAEL012834, AAEL_AAEL012551, AAEL_AAEL002330, AAEL_AAEL012693, AAEL_AAE…	69	1405	6775	2.09655	0.00234801	0.00234801	0.034359
GOTERM_MF_FAT	GO:0046914~transition metal ion binding	33	16.6667	0.000160384	AAEL_AAEL003339, AAEL_AAEL002753, AAEL_AAEL006827, AAEL_AAEL000337, AAEL_AAEL008429, AAEL_AAEL001958, AAEL_AAEL003692, AAEL_AAEL008602, AAEL_AAEL015042, AAEL_AAEL008903, AAEL_AAEL009762, AAEL_AAEL011838, AAEL_AAEL011141, AAEL_AAEL009768, AAEL_AAEL006839, AAEL_AAEL013048, AAEL_AAEL005923, AAEL_AAEL004170, AAEL_AAEL006986, AAEL_AAEL014210, AAEL_AAEL013168, AAEL_AAEL008547, AAEL_AAEL012834, AAEL_AAE…	69	1774	6775	1.8265	0.0113236	0.0056779	0.16634
GOTERM_MF_FAT	GO:0046872~metal ion binding	33	16.6667	0.00287192	AAEL_AAEL003339, AAEL_AAEL002753, AAEL_AAEL006827, AAEL_AAEL000337, AAEL_AAEL008429, AAEL_AAEL001958, AAEL_AAEL003692, AAEL_AAEL008602, AAEL_AAEL015042, AAEL_AAEL008903, AAEL_AAEL009762, AAEL_AAEL011838, AAEL_AAEL011141, AAEL_AAEL009768, AAEL_AAEL006839, AAEL_AAEL013048, AAEL_AAEL005923, AAEL_AAEL004170, AAEL_AAEL006986, AAEL_AAEL014210, AAEL_AAEL013168, AAEL_AAEL008547, AAEL_AAEL012834, AAEL_AAE…	69	2066	6775	1.56835	0.184701	0.0658018	2.94099
GOTERM_MF_FAT	GO:0043169~cation binding	33	16.6667	0.00529535	AAEL_AAEL003339, AAEL_AAEL002753, AAEL_AAEL006827, AAEL_AAEL000337, AAEL_AAEL008429, AAEL_AAEL001958, AAEL_AAEL003692, AAEL_AAEL008602, AAEL_AAEL015042, AAEL_AAEL008903, AAEL_AAEL009762, AAEL_AAEL011838, AAEL_AAEL011141, AAEL_AAEL009768, AAEL_AAEL006839, AAEL_AAEL013048, AAEL_AAEL005923, AAEL_AAEL004170, AAEL_AAEL006986, AAEL_AAEL014210, AAEL_AAEL013168, AAEL_AAEL008547, AAEL_AAEL012834, AAEL_AAE…	69	2141	6775	1.51341	0.314063	0.0899377	5.36165
GOTERM_MF_FAT	GO:0043167~ion binding	33	16.6667	0.00529535	AAEL_AAEL003339, AAEL_AAEL002753, AAEL_AAEL006827, AAEL_AAEL000337, AAEL_AAEL008429, AAEL_AAEL001958, AAEL_AAEL003692, AAEL_AAEL008602, AAEL_AAEL015042, AAEL_AAEL008903, AAEL_AAEL009762, AAEL_AAEL011838, AAEL_AAEL011141, AAEL_AAEL009768, AAEL_AAEL006839, AAEL_AAEL013048, AAEL_AAEL005923, AAEL_AAEL004170, AAEL_AAEL006986, AAEL_AAEL014210, AAEL_AAEL013168, AAEL_AAEL008547, AAEL_AAEL012834, AAEL_AAE…	69	2141	6775	1.51341	0.314063	0.0899377	5.36165
Annotation Cluster 2	Enrichment Score: 0.9559160439828971
Category	Term	Count	%	PValue	Genes	List Total	Pop Hits	Pop Total	Fold Enrichment	Bonferroni	Benjamini	FDR
GOTERM_MF_FAT	GO:0043565~sequence-specific DNA binding	6	3.0303	0.0462658	AAEL_AAEL009263, AAEL_AAEL004130, AAEL_AAEL013168, AAEL_AAEL007285, AAEL_AAEL013518, AAEL_AAEL002477	69	196	6775	3.00577	0.965379	0.48965	38.8393
GOTERM_MF_FAT	GO:0003677~DNA binding	11	5.55556	0.0917907	AAEL_AAEL013048, AAEL_AAEL003669, AAEL_AAEL009263, AAEL_AAEL003685, AAEL_AAEL004130, AAEL_AAEL013168, AAEL_AAEL008148, AAEL_AAEL007285, AAEL_AAEL013518, AAEL_AAEL002477, AAEL_AAEL002442	69	624	6775	1.73089	0.998926	0.623395	63.1867
GOTERM_MF_FAT	GO:0003700~transcription factor activity	6	3.0303	0.107917	AAEL_AAEL009263, AAEL_AAEL004130, AAEL_AAEL013168, AAEL_AAEL007285, AAEL_AAEL013518, AAEL_AAEL002477	69	252	6775	2.33782	0.999699	0.637052	69.4335
GOTERM_MF_FAT	GO:0030528~transcription regulator activity	6	3.0303	0.32748	AAEL_AAEL009263, AAEL_AAEL004130, AAEL_AAEL013168, AAEL_AAEL007285, AAEL_AAEL013518, AAEL_AAEL002477	69	377	6775	1.56268	1	0.922747	98.3718
Annotation Cluster 3	Enrichment Score: 0.48823662419528135
Category	Term	Count	%	PValue	Genes	List Total	Pop Hits	Pop Total	Fold Enrichment	Bonferroni	Benjamini	FDR
GOTERM_MF_FAT	GO:0005272~sodium channel activity	3	1.51515	0.0579811	AAEL_AAEL002326, AAEL_AAEL000443, AAEL_AAEL013647	69	39	6775	7.55295	0.985604	0.506782	46.2027
GOTERM_MF_FAT	GO:0005261~cation channel activity	3	1.51515	0.254366	AAEL_AAEL002326, AAEL_AAEL000443, AAEL_AAEL013647	69	97	6775	3.03675	1	0.901289	95.2475
GOTERM_MF_FAT	GO:0046873~metal ion transmembrane transporter activity	3	1.51515	0.321503	AAEL_AAEL002326, AAEL_AAEL000443, AAEL_AAEL013647	69	115	6775	2.56144	1	0.936322	98.2151
GOTERM_MF_FAT	GO:0022838~substrate specific channel activity	3	1.51515	0.531311	AAEL_AAEL002326, AAEL_AAEL000443, AAEL_AAEL013647	69	176	6775	1.67367	1	0.965362	99.9616
GOTERM_MF_FAT	GO:0005216~ion channel activity	3	1.51515	0.531311	AAEL_AAEL002326, AAEL_AAEL000443, AAEL_AAEL013647	69	176	6775	1.67367	1	0.965362	99.9616
GOTERM_MF_FAT	GO:0015267~channel activity	3	1.51515	0.534389	AAEL_AAEL002326, AAEL_AAEL000443, AAEL_AAEL013647	69	177	6775	1.66421	1	0.958932	99.9642
GOTERM_MF_FAT	GO:0022803~passive transmembrane transporter activity	3	1.51515	0.534389	AAEL_AAEL002326, AAEL_AAEL000443, AAEL_AAEL013647	69	177	6775	1.66421	1	0.958932	99.9642
Annotation Cluster 4	Enrichment Score: 0.38936400826458456
Category	Term	Count	%	PValue	Genes	List Total	Pop Hits	Pop Total	Fold Enrichment	Bonferroni	Benjamini	FDR
GOTERM_MF_FAT	GO:0008061~chitin binding	3	1.51515	0.358288	AAEL_AAEL004157, AAEL_AAEL008380, AAEL_AAEL000901	69	125	6775	2.35652	1	0.927541	98.9992
GOTERM_MF_FAT	GO:0001871~pattern binding	3	1.51515	0.361932	AAEL_AAEL004157, AAEL_AAEL008380, AAEL_AAEL000901	69	126	6775	2.33782	1	0.914044	99.0566
GOTERM_MF_FAT	GO:0030247~polysaccharide binding	3	1.51515	0.361932	AAEL_AAEL004157, AAEL_AAEL008380, AAEL_AAEL000901	69	126	6775	2.33782	1	0.914044	99.0566
GOTERM_MF_FAT	GO:0030246~carbohydrate binding	3	1.51515	0.59028	AAEL_AAEL004157, AAEL_AAEL008380, AAEL_AAEL000901	69	196	6775	1.50288	1	0.964361	99.9905
Annotation Cluster 5	Enrichment Score: 0.13753168706375535
Category	Term	Count	%	PValue	Genes	List Total	Pop Hits	Pop Total	Fold Enrichment	Bonferroni	Benjamini	FDR
GOTERM_MF_FAT	GO:0020037~heme binding	3	1.51515	0.665907	AAEL_AAEL006827, AAEL_AAEL009762, AAEL_AAEL009768	69	225	6775	1.30918	1	0.979595	99.9989
GOTERM_MF_FAT	GO:0046906~tetrapyrrole binding	3	1.51515	0.668307	AAEL_AAEL006827, AAEL_AAEL009762, AAEL_AAEL009768	69	226	6775	1.30339	1	0.976032	99.9989
GOTERM_MF_FAT	GO:0009055~electron carrier activity	3	1.51515	0.769916	AAEL_AAEL006827, AAEL_AAEL009762, AAEL_AAEL009768	69	275	6775	1.07115	1	0.991278	100
GOTERM_MF_FAT	GO:0005506~iron ion binding	3	1.51515	0.822319	AAEL_AAEL006827, AAEL_AAEL009762, AAEL_AAEL009768	69	308	6775	0.956381	1	0.995173	100
Annotation Cluster 6	Enrichment Score: 0.08766502547002128
Category	Term	Count	%	PValue	Genes	List Total	Pop Hits	Pop Total	Fold Enrichment	Bonferroni	Benjamini	FDR
GOTERM_MF_FAT	GO:0004672~protein kinase activity	4	2.0202	0.469502	AAEL_AAEL001559, AAEL_AAEL007632, AAEL_AAEL011669, AAEL_AAEL004761	69	253	6775	1.55239	1	0.950245	99.8612
GOTERM_MF_FAT	GO:0004674~protein serine/threonine kinase activity	3	1.51515	0.549579	AAEL_AAEL001559, AAEL_AAEL007632, AAEL_AAEL004761	69	182	6775	1.61849	1	0.956975	99.9746
GOTERM_MF_FAT	GO:0005524~ATP binding	6	3.0303	0.874585	AAEL_AAEL001559, AAEL_AAEL007632, AAEL_AAEL007918, AAEL_AAEL011669, AAEL_AAEL008320, AAEL_AAEL004761	69	735	6775	0.801538	1	0.997849	100
GOTERM_MF_FAT	GO:0032559~adenyl ribonucleotide binding	6	3.0303	0.87611	AAEL_AAEL001559, AAEL_AAEL007632, AAEL_AAEL007918, AAEL_AAEL011669, AAEL_AAEL008320, AAEL_AAEL004761	69	737	6775	0.799363	1	0.997344	100
GOTERM_MF_FAT	GO:0032553~ribonucleotide binding	7	3.53535	0.891801	AAEL_AAEL001559, AAEL_AAEL008029, AAEL_AAEL007632, AAEL_AAEL007918, AAEL_AAEL011669, AAEL_AAEL008320, AAEL_AAEL004761	69	880	6775	0.781044	1	0.997695	100
GOTERM_MF_FAT	GO:0032555~purine ribonucleotide binding	7	3.53535	0.891801	AAEL_AAEL001559, AAEL_AAEL008029, AAEL_AAEL007632, AAEL_AAEL007918, AAEL_AAEL011669, AAEL_AAEL008320, AAEL_AAEL004761	69	880	6775	0.781044	1	0.997695	100
GOTERM_MF_FAT	GO:0000166~nucleotide binding	9	4.54545	0.921675	AAEL_AAEL000769, AAEL_AAEL001559, AAEL_AAEL008029, AAEL_AAEL007632, AAEL_AAEL007918, AAEL_AAEL011669, AAEL_AAEL008320, AAEL_AAEL004761, AAEL_AAEL007013	69	1173	6775	0.753364	1	0.998766	100
GOTERM_MF_FAT	GO:0001883~purine nucleoside binding	6	3.0303	0.927555	AAEL_AAEL001559, AAEL_AAEL007632, AAEL_AAEL007918, AAEL_AAEL011669, AAEL_AAEL008320, AAEL_AAEL004761	69	821	6775	0.717577	1	0.998714	100
GOTERM_MF_FAT	GO:0030554~adenyl nucleotide binding	6	3.0303	0.927555	AAEL_AAEL001559, AAEL_AAEL007632, AAEL_AAEL007918, AAEL_AAEL011669, AAEL_AAEL008320, AAEL_AAEL004761	69	821	6775	0.717577	1	0.998714	100
GOTERM_MF_FAT	GO:0001882~nucleoside binding	6	3.0303	0.929458	AAEL_AAEL001559, AAEL_AAEL007632, AAEL_AAEL007918, AAEL_AAEL011669, AAEL_AAEL008320, AAEL_AAEL004761	69	825	6775	0.714097	1	0.998484	100
GOTERM_MF_FAT	GO:0017076~purine nucleotide binding	7	3.53535	0.936773	AAEL_AAEL001559, AAEL_AAEL008029, AAEL_AAEL007632, AAEL_AAEL007918, AAEL_AAEL011669, AAEL_AAEL008320, AAEL_AAEL004761	69	967	6775	0.710774	1	0.998547	100
